## Corrigendum

### Feeding and growth of Atlantic cod (*Gadus morhua* L.) in the eastern Baltic Sea under environmental change

Stefan Neuenfeldt <sup>1\*</sup>, Valerio Bartolino<sup>2</sup>, Alessandro Orio <sup>2</sup>, Ken H. Andersen<sup>1</sup>, Niels G. Andersen<sup>1</sup>, Susa Niiranen<sup>3</sup>, Ulf Bergström<sup>4</sup>, Didzis Ustups<sup>5</sup>, Nataliia Kulatska<sup>2</sup>, and Michele Casini <sup>2</sup>

<sup>1</sup>National Institute of Aquatic Resources, Technical University of Denmark, 2800 Kongens Lyngby, Denmark

<sup>2</sup>Department of Aquatic Resources, Institute of Marine Research, Swedish University of Agricultural Sciences, Turistgatan 5, Lysekil 45330, Sweden

<sup>3</sup>Stockholm Resilience Centre, Stockholm University, Kräftriket 2B, Stockholm 10691, Sweden

<sup>4</sup>Department of Aquatic Resources, Institute of Coastal Research, Swedish University of Agricultural Sciences, Skolgatan 6, Öregrund 74242, Sweden

<sup>5</sup>Fish Resources Research Department, Institute of Food Safety, Animal Health and Environment, Daugavgrivas 8, Riga 1048, Latvia

\*Corresponding author: tel: +45 3396 3402; e-mail: [stn@aqu.dtu.dk](mailto:stn@aqu.dtu.dk).

Neuenfeldt, S., Bartolino, V., Orio, A., Andersen, K. H., Andersen, N. G., Niiranen, S., Bergström, U., Ustups, D., Kulatska, N., and Casini, M. Feeding and growth of Atlantic cod (*Gadus morhua* L.) in the eastern Baltic Sea under environmental change. – ICES Journal of Marine Science, doi:10.1093/icesjms/fsz224.

Advance access publication 16 January 2020.

ICES Journal of Marine Science (2019), doi:10.1093/icesjms/fsz224

In the originally published version of this article there was an error in figure 5. This has now been corrected.

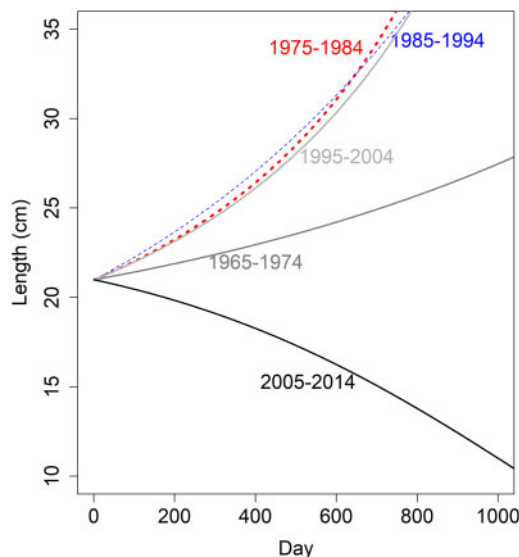

**Figure 5.** Simulated growth trajectories of *Gadus morhua* in the total length range 21–35 cm for the five decades covered by the stomach sampling programme.
